# Supplementary material for: Soil Fauna and Ecosystem Services in Agroecological Cropping Systems: Focus on Experimental Open-Field Market Gardens
Source: MDPI journal article supplement (doi:10.3390/soilsystems8010026), 2024-02-22
Supplement: s1 [file s1]

**Table S1.** Soil macrofauna morphospecies and functional groups in two agroecological market-gardening cropping systems on vertisol (Godet, Petit-Canal).

| Order/Suborder   | Family/Subfamily | Morphospecies                   | Functional group             |
|------------------|------------------|---------------------------------|------------------------------|
| Spirobolida      | Trigonuulidae    | <i>Trigoniulus corallinus</i>   | Litter transformer           |
| Hymenoptera      | Formicidae       | <i>Technomyrmex difficilis</i>  | Ecosystem engineer           |
|                  |                  | <i>Ectatomma ruidum</i>         | Predator/ Ecosystem engineer |
|                  |                  | <i>Cyphomyrmex minutus</i>      | Ecosystem engineer           |
|                  |                  | <i>Solenopsis invicta</i> Buren | Predator/ Ecosystem engineer |
|                  |                  | <i>Solenopsis geminata</i>      | Predator/ Ecosystem engineer |
|                  |                  | <i>Camponotus sexguttatus</i>   | Predator/ Ecosystem engineer |
|                  |                  | <i>Cardiocondyla ermeryi</i>    | Predator/ Ecosystem engineer |
| Crassiclitellata | Megascolecidae   | <i>Polypheretima elongata</i>   | Ecosystem engineer           |
|                  | Glossoscolecidae | <i>Pontoscolex corethrurus</i>  | Ecosystem engineer           |
| Coleoptera       | Staphylinidae    | <i>Cafius</i> sp.               | Predator                     |
|                  | Nitidulidae      | <i>Colopterus</i> sp.           | Predator                     |
|                  | Trechinae        | <i>Tachys</i> sp.               | Litter transformer           |
| Isopoda          | Platyarthridae   | Platyarthridae sp.              | Litter transformer           |
|                  | Philosciidae     | Philosciidae sp.                | Litter transformer           |
| Dermaptera       | Carcinophoridae  | <i>Euborellia annulipes</i>     | Predator/Litter transformer  |
| Araneae          | Tetragnathidae   | Tetragnathidae sp.              | Predator                     |
|                  | Theridiidae      | Theridiidae sp.                 | Predator                     |
|                  | Thomisidae       | Thomisidae sp.                  | Predator                     |
|                  | Araneidae        | Araneidae sp.                   | Predator                     |
|                  | Araneidae        | Alpaida sp.                     | Predator                     |
| Stylommatophora  | Bulimulidae      | Bulimulidae sp.                 | Litter transformer           |
| Turbellaria      | -                | Turbellaria sp.                 | Litter transformer           |
| Hemiptera        | Aphididae        | Aphididae sp.                   | Litter transformer           |
| Hymenoptera      | Vespidae         | <i>Polistes tricolor</i>        | Litter transformer           |
| Geophilomorpha   | Geophilidae      | Geophilidae sp.                 | Predator                     |

**Table S2.** Aerial diversity observed on plants in two agroecological market-gardening cropping systems on vertisol (Godet, Petit-Canal).

|                         | <b>Family/Subfamily</b> | <b>Morphospecies</b>    | <b>AG</b> | <b>AGSPP</b> |
|-------------------------|-------------------------|-------------------------|-----------|--------------|
| <b>Crop pests</b>       | Pseudococcoidae         | Peusodococcoidea sp.    | Presence  | Presence     |
|                         | Noctuidae               | <i>Helicoverpa zea</i>  | Presence  | Absence      |
|                         | Noctuidae               | <i>Agrotis</i> sp.      | Presence  | Absence      |
|                         | Thripidae               | <i>Thrips tabaci</i>    | Presence  | Presence     |
|                         | Aleyrodidae             | <i>Bemisia tabaci</i>   | Presence  | Presence     |
|                         | Pentatomidae            | <i>Nezara</i> sp.       | Presence  | Presence     |
|                         | Coreidae                | Coreidae sp.            | Presence  | Presence     |
|                         | Aphrophoridae           | <i>Aphrophora</i> sp.1  | Presence  | Presence     |
|                         | Aphrophoridae           | <i>Aphrophora</i> sp.2  | Presence  | Presence     |
| <b>Crop beneficials</b> | Coccinellidae           | Coccinellidae sp.1      | Presence  | Presence     |
|                         | Coccinellidae           | Coccinellidae sp.2      | Presence  | Presence     |
|                         | Apoidea                 | Apoidae sp.1            | Presence  | Presence     |
|                         | Apoidea                 | Apoidae sp.2            | Presence  | Presence     |
|                         | Vespidae                | Vespidae sp.1           | Absence   | Presence     |
|                         | Vespidae                | Vespidae sp.2           | Absence   | Presence     |
|                         | Nymphalidae             | <i>Danaus plexippus</i> | Absence   | Presence     |
|                         | Theridiidae             | Theridiidae sp.         | Absence   | Presence     |
|                         | Thomisidae              | Thomisidae sp.          | Presence  | Presence     |
|                         | Araneidae               | <i>Alpaida</i> sp.      | Absence   | Presence     |
|                         | Scolopendridae          | Scolopendridae sp.      | Absence   | Presence     |
